# Supplementary material for: Psychological Antecedents of Italian Sport Coaches’ Coaching Behaviors: The Role of Basic Psychological Needs, Motivation and Subjective Vitality
Source: MDPI journal article supplement (doi:10.3390/healthcare11202797), 2023-10-22

Healthcare 2023, 11, 2797. <https://doi.org/10.3390/healthcare11202797>

[www.mdpi.com/journal/healthcare](http://www.mdpi.com/journal/healthcare)

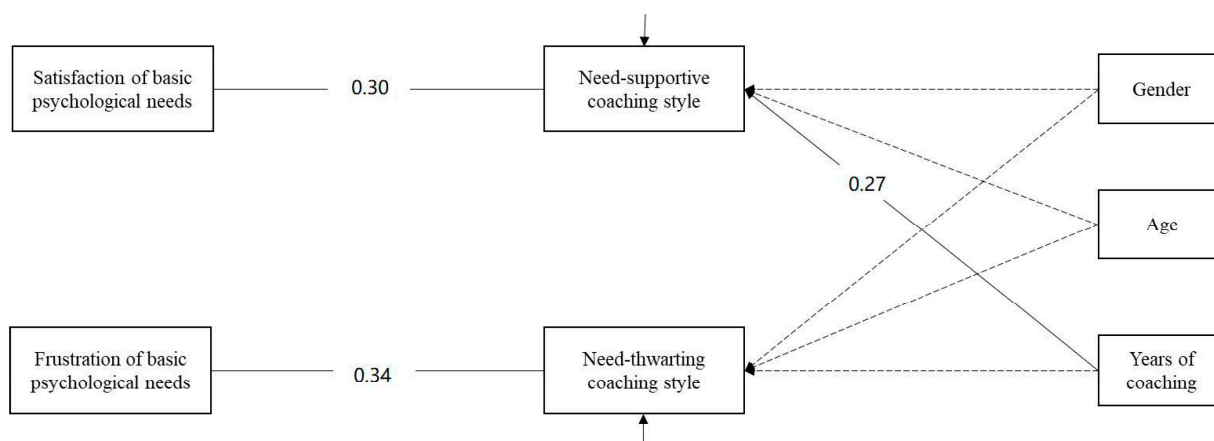

Supplement: s1 [file s1]
